# Supplementary material
Source: publisher site journal article supplement (https://www.dovepress.com/get_supplementary_file.php?f=401652.docx)
Supplement: Supplementary file 1 [file get_supplementary_file.php]

**Grit Psychological Resources Scale (GPRS)**

**Instructions – General Use**

For each statement below, indicate your level of agreement. When responding, consider your behaviour in general. Think about your current behaviour—not how you think you should or want to be. If your behaviour is considerably different at work, select the response that best reflects you outside work. There are no right or wrong answers, so please answer honestly.

**Response Options**

1 = Very Strongly Disagree

2 = Strongly Disagree

3 = Disagree

4 = Neutral

5 = Agree

6 = Strongly Agree

7 = Very Strongly Agree

| **Statement** | **1** | **2** | **3** | **4** | **5** | **6** | **7** |
| --- | --- | --- | --- | --- | --- | --- | --- |
| 1. I am able to tolerate uncertainty with the way forward. | ¡ | ¡ | ¡ | ¡ | ¡ | ¡ | ¡ |
| 1. I am always looking to learn new things. | ¡ | ¡ | ¡ | ¡ | ¡ | ¡ | ¡ |
| 1. I am usually aware of my behaviour. | ¡ | ¡ | ¡ | ¡ | ¡ | ¡ | ¡ |
| 1. I can work outside my comfort zone. | ¡ | ¡ | ¡ | ¡ | ¡ | ¡ | ¡ |
| 1. I usually persist with learning. | ¡ | ¡ | ¡ | ¡ | ¡ | ¡ | ¡ |
| 1. I am committed to my goals. | ¡ | ¡ | ¡ | ¡ | ¡ | ¡ | ¡ |
| 1. I pursue activities that are of value to me. | ¡ | ¡ | ¡ | ¡ | ¡ | ¡ | ¡ |
| 1. My goals provide purposeful direction. | ¡ | ¡ | ¡ | ¡ | ¡ | ¡ | ¡ |
| 1. I try to learn from bad experiences. | ¡ | ¡ | ¡ | ¡ | ¡ | ¡ | ¡ |
| 1. I can overcome negative emotions when things are tough. | ¡ | ¡ | ¡ | ¡ | ¡ | ¡ | ¡ |
| 1. I usually rebound after difficulties. | ¡ | ¡ | ¡ | ¡ | ¡ | ¡ | ¡ |
| 1. I have the capabilities to be successful. | ¡ | ¡ | ¡ | ¡ | ¡ | ¡ | ¡ |
| 1. As a rule I keep trying until I figure things out. | ¡ | ¡ | ¡ | ¡ | ¡ | ¡ | ¡ |
| 1. I am good at dealing with challenges. | ¡ | ¡ | ¡ | ¡ | ¡ | ¡ | ¡ |
| 1. What I want to achieve is clear to me. | ¡ | ¡ | ¡ | ¡ | ¡ | ¡ | ¡ |
| 1. Continuous improvement is important to me. | ¡ | ¡ | ¡ | ¡ | ¡ | ¡ | ¡ |
| 1. Feedback helps me to improve. | ¡ | ¡ | ¡ | ¡ | ¡ | ¡ | ¡ |
| 1. I can improve my capabilities with effort. | ¡ | ¡ | ¡ | ¡ | ¡ | ¡ | ¡ |
| 1. I find most problems can be solved. | ¡ | ¡ | ¡ | ¡ | ¡ | ¡ | ¡ |
| 1. I can stay focused on the big picture. | ¡ | ¡ | ¡ | ¡ | ¡ | ¡ | ¡ |

**Scoring**

The average grit psychological resources (GPR) score is calculated by summing all the statement responses and dividing the total by 20. Possible scores range from 1 to 7 and indicate the GPR level shown in the table below.

| **Score** | **Resource Level** |
| --- | --- |
| Less than 2 | Level 1 – Undeveloped |
| 2 to less than 3 | Level 2 – Foundational |
| 3 to less than 4 | Level 3 – Intermediate |
| 4 to less than 5 | Level 4 – Developed |
| 5 to less than 6 | Level 5 – Well-developed |
| 6 to less than 7 | Level 6 – Advanced |

The average sub-scale scores are calculated by summing the statement responses for each psychological resource and dividing the total by 5: statements 1 to 5 for interest, statements 6 to 10 for purpose, statements 11 to 15 for practice, and statements 16 to 20 for hope. Sub-scale scores can be interpreted similarly to the GPR score and used to provide more detailed information on developmental opportunities.

**Workplace Use**

Given that one’s perceived GPR may be influenced by the surrounding environment, separate instructions have been developed for administering the scale in the workplace. At a workplace level, respondents can answer from an individual perspective (i.e., behaviour when doing work that contributes to individual goals) or a team perspective (i.e., behaviour when doing work that contributes to team goals).

**Access and Permission**

The GPRS is publicly available for use, provided the authors and original source are correctly attributed. Additional instructions for workplace use can be obtained from the first author upon request.
